# Supplementary material
Source: PubMed Central journal article supplement (PMC4621989)
Supplement: BPH-172-4888-s001.pdf [file BPH-172-4888-s001.pdf]

## Supporting Information

### A. Supplementary Tables

**Table S1.** Effects of selected organic compounds on [<sup>3</sup>H]clonidine (A) and [<sup>3</sup>H]naloxone (B) uptake in hCMEC/D3 cells.

**A**

| <b>Compound</b> | <b>Concentration (mM)</b> | <b>Relative uptake [<sup>3</sup>H]clonidine (%)</b> |
|-----------------|---------------------------|-----------------------------------------------------|
| Control         |                           | 100 ± 4.9                                           |
| TEA             | 2                         | 92.4 ± 2.0                                          |
| Nicotine        | 0.1                       | 59.6 ± 1.9**                                        |
| Diphenhydramine | 0.05                      | 35.4 ± 1.6***                                       |
| Verapamil       | 0.05                      | 14.5 ± 0.8***                                       |
| Codeine         | 0.05                      | 58.1 ± 2.2***                                       |
| Naloxone        | 0.1                       | 30.7 ± 12.0*                                        |
| Oxycodone       | 0.05                      | 48.8 ± 7.4*                                         |
| Cocaine         | 0.05                      | 43.1 ± 0.2***                                       |

**B**

| <b>Compound</b> | <b>Concentration (mM)</b> | <b>Relative uptake [<sup>3</sup>H]naloxone (%)</b> |
|-----------------|---------------------------|----------------------------------------------------|
| Control         |                           | 100 ± 9.8                                          |
| TEA             | 5                         | 108.1 ± 10.3                                       |
| Carnitine       | 5                         | 105.3 ± 4.9                                        |
| Choline         | 5                         | 99.2 ± 9.9                                         |
| Nicotine        | 0.1                       | 75.0 ± 4.0***                                      |
| Clonidine       | 0.05                      | 49.7 ± 1.6 ***                                     |
| Diphenhydramine | 0.05                      | 31.3 ± 1.3 ***                                     |
| Verapamil       | 0.05                      | 25.7 ± 1.7 ***                                     |
| Codeine         | 0.05                      | 52.5 ± 2.0 ***                                     |
| Oxycodone       | 0.1                       | 46.5 ± 2.1***                                      |
| Cocaine         | 0.05                      | 61.3 ± 3.6***                                      |

The inhibition of the transport of [<sup>3</sup>H]clonidine and [<sup>3</sup>H]naloxone (~2 nmol.L<sup>-1</sup>) by the compounds above was evaluated in hCMEC/D3 cell an incubation time of 5 min in Krebs-HEPES buffer (pH<sub>e</sub> 7.40). Data are expressed as means ± SD (performed in triplicate). \*: p<0.05, \*\*: p<0.01, \*\*\*: p<0.001 compared to the control group.

**Table S2.** Inhibition potency of selected organic compounds against [<sup>3</sup>H]cocaine (A) and [<sup>3</sup>H]naloxone (B) transport in hCMEC/D3 cells.

**A**

| <b>Compound</b>   | <b>IC<sub>50</sub> (μmol.L<sup>-1</sup>)</b> |
|-------------------|----------------------------------------------|
| Imipramine*       | 0.20 ± 0.05                                  |
| Desipramine       | 0.33 ± 0.05                                  |
| Amitriptyline     | 0.42 ± 0.05                                  |
| Nortriptyline     | 0.48 ± 0.12                                  |
| Clomipramine      | 0.50 ± 0.07                                  |
| Methadone         | 0.50 ± 0.05                                  |
| Doxepin           | 0.71 ± 0.10                                  |
| Verapamil*        | 1.48 ± 0.15                                  |
| Diphenhydramine   | 1.60 ± 0.21                                  |
| Buprenorphine*    | 4.67 ± 0.86                                  |
| MDMA              | 5.02 ± 0.61                                  |
| Norbuprenorphine* | 5.75 ± 1.60                                  |
| Cocaethylene      | 5.79 ± 0.60                                  |

**B**

| <b>Compound</b>   | <b>IC<sub>50</sub> (μM)</b> |
|-------------------|-----------------------------|
| Imipramine*       | 1.0 ± 0.3                   |
| Amitriptyline     | 1.1 ± 0.1                   |
| Clomipramine      | 1.1 ± 0.2                   |
| Nortriptyline     | 1.4 ± 0.4                   |
| Desipramine       | 1.4 ± 0.2                   |
| Doxepine          | 2.3 ± 0.5                   |
| Methadone         | 4.8 ± 0.8                   |
| Diphenhydramine   | 8.6 ± 2.1                   |
| Norbuprenorphine* | 9.8 ± 1.6                   |
| Buprenorphine*    | 13.9 ± 1.5                  |
| Cocaethylene      | 15.5 ± 3.0                  |
| Verapamil*        | 15.5 ± 2.5                  |
| MDMA              | 16.0 ± 3.2                  |

Determination of IC<sub>50</sub> for previously selected G-I compounds on [<sup>3</sup>H]cocaine (A) and [<sup>3</sup>H]naloxone (B) uptake in hCMEC/D3 cells. The uptake of the labeled drug was measured for 5 min in hCMEC/D3 cells and plotted against the inhibitor at 7 selected concentrations (0.1; 1, 10, 50; 100; 1000 and 2000 μM depending on the compound solubility) in Krebs-HEPES incubation medium (pH<sub>e</sub> 7.40; 37°C). Results were fitted according to equation 2.

\* Compounds were tested at lower concentration due to lack of solubility: ≤500 μmol.L<sup>-1</sup> for buprenorphine and ≤1 mmol.L<sup>-1</sup> for norbuprenorphine, imipramine and verapamil. MDMA (3,4-methylene-dioxy-methamphetamine).

**Table S3.** Predicted pKa value and charge of the most abundant species at pH=7.4.

| Compound         | pKa <sup>(1)</sup> | charge at pH=7.4 | Compound           | pKa <sup>(1)</sup> | charge at pH=7.4        |
|------------------|--------------------|------------------|--------------------|--------------------|-------------------------|
| Nortriptyline    | 9.61(b)            | positive         | Clonidine          | 8.52               | positive                |
| Desipramine      | 9.88(b), 5.04(b)   | positive         | Codeine            | 8.40(b)            | positive                |
| Imipramine       | 9.04(b), 4.66(b)   | positive         | Oxymorphone        | 7.80(b), 9.39(a)   | positive                |
| Amitriptyline    | 8.69(b)            | positive         | Hydromorphone      | 8.35(b), 9.08(a)   | positive                |
| Quinine          | 8.11(b), 4.18(b)   | positive         | Naloxone           | 7.30(b), 9.39(a)   | positive                |
| Methadone        | 8.61(b)            | positive         | Nicotine           | 8.98(b), 3.11(b)   | positive                |
| Verapamil        | 8.93 (b)           | positive         | Morphine           | 8.40(b), 9.48(a)   | positive                |
| MDMA             | 9.47(b)            | positive         | Dihydromorphone    | 9.15(b), 9.91(a)   | positive                |
| Buprenorphine    | 8.68(b), 9.87(a)   | positive         | Cotinine           | 4.90(b)            | neutral                 |
| Desomorphine     | 9.19(b),10.25(a)   | positive         | Ecgonine           | 10.24(b), 3.57(a)  | zwitterion              |
| Norbuprenorphine | 9.95(b),10.55(a)   | positive         | Tetraethylammonium | -                  | positive <sup>(2)</sup> |
| Diphenhydramine  | 8.55(b)            | positive         | Benzoyllecgonine   | 9.66(b), 3.12(a)   | zwitterionic            |
| Cocaethylene     | 8.23(b)            | positive         | Choline            | -                  | Positive <sup>(2)</sup> |
| Norcocaine       | 9.46(b)            | positive         | Carnitine          | 3.85(a)            | zwitterion              |
| 6-Acetylcodeine  | 8.09(b)            | positive         | Guanidine          | 14.00(b)           | positive                |
| Hydrocodone      | 8.48(b)            | positive         | MPP                | -                  | positive <sup>(2)</sup> |
| Cocaine          | 8.24(b)            | positive         | Histamine          | 9.96(b), 5.96(b)   | positive                |
| 6-MAM            | 8.09(b), 9.56(a)   | positive         | Serotonin          | 10.06(b),10.65(a)  | positive                |
| Tramadol         | 9.01(b)            | positive         | Dopamine           | 9.76(b), 8.87(a)   | positive                |
| Nalbuphine       | 8.14(b),10.35(a)   | positive         | Agmatine           | 10.90 (b)          | positive                |
| Heroine          | 8.09(b)            | positive         | L-dopa             | 9.37(b), 2.27(a)   | zwitterionic            |
| Oxycodone        | 7.80(b),16.60(a)   | positive         | Cimetidine         | 6.52(b)            | neutral                 |

(1) pKa values were predicted using the MoKa 2.5 software. (2) ammonium salts, with permanent protonated nitrogen.

**Table S4.** Virtual screening selected hits from the Tropsha et al. database (Sedykh *et al.*, 2013).

| Compound                     | SMILES                                                 | Concatenated "TARGET"        |
|------------------------------|--------------------------------------------------------|------------------------------|
| <b>1-Phenethylpiperidine</b> | <chem>C(Cc1ccccc1)N1CCCCC1</chem>                      | MDR1                         |
| <b>Aminopentamide</b>        | <chem>CC(CC(C(=O)N)(c1ccccc1)c2ccccc2)N(C)C</chem>     | MDR1                         |
| <b>Amitriptyline</b>         | <chem>N(C)(C)CCC=C2C1=C(C=CC=C1)CCC3=C2C=CC=C3</chem>  | MDR1, BCRP, MRP2, OCT1       |
| <b>Antazoline</b>            | <chem>N\1=C(\NCC/1)CN(c2ccccc2)Cc3ccccc3</chem>        | MDR1                         |
| <b>Atropine</b>              | <chem>O(C(=O)C(C1=CC=CC=C1)CO)C2CC3N(C)C(C2)CC3</chem> | MDR1, BCRP, MRP2, ASBT, OCT1 |
| <b>Biperiden</b>             | <chem>OC(CCN1CCCCC1)(C1CC2CC1C=C2)c1ccccc1</chem>      | MDR1                         |
| <b>Butethamate</b>           | <chem>CCC(C(=O)OCCN(CC)CC)c1ccccc1</chem>              | MDR1                         |
| <b>Chlorpheniramine</b>      | <chem>CN(C)CCC(c1ccc(cc1)Cl)c2cccn2</chem>             | MDR1, OCT1                   |
| <b>Chlorpromazine</b>        | <chem>ClC2=CC=C1SC3=C(N(CCCN(C)C)C1=C2)C=CC=C3</chem>  | MDR1, BCRP, MRP2, OCT1       |
| <b>Chlorprothixene</b>       | <chem>CN(C)CC/C=C\1/c2ccccc2Sc3c1cc(cc3)Cl</chem>      | MDR1, BCRP, MRP2, OCT1       |

|                                        |                                                                                                                 |            |
|----------------------------------------|-----------------------------------------------------------------------------------------------------------------|------------|
| <b>Clemastine fumurate</b>             | <chem>CN1CCC[C@@H]1CCO[C@](C)(C1=CC=CC=C1)C1=CC=C(C1)C=C1</chem>                                                | MDR1, OCT1 |
| <b>Clindamycin</b>                     | <chem>CCC[C@@H]1C[C@H](N(C1)C)C(=O)N[C@@H]([C@@H]2[C@@H]([C@@H]([C@H]([C@H](O2)SC)O)O)O)[C@H](C)C1</chem>       | MDR1       |
| <b>Clofedanol</b>                      | <chem>CN(C)CCC(O)(c1ccccc1)c2ccccc2C1</chem>                                                                    | MDR1       |
| <b>Clomipramine</b>                    | <chem>C1C3=CC=C2C(N(CCCN(C)C)C1=C(C=CC=C1)CC2)=C3</chem>                                                        | MDR1, OCT1 |
| <b>D-617 (metabolite of Verapamil)</b> | <chem>CNCCCC(C#N)(C(C)C)C1=CC(OC)=C(OC)C=C1</chem>                                                              | MDR1       |
| <b>Delsoline</b>                       | <chem>CCN1C[C@@]2(CCC([C@@]34[C@@H]2[C@@H](C(C31)(C5(C[C@@H]([C@H]6C[C@@H]4[C@@H]5[C@H]6OC)OC)O)OC)O)COC</chem> | MDR1       |
| <b>Doxapram</b>                        | <chem>O4CCN(CCC3C(C1=CC=CC=C1)(C2=CC=CC=C2)C(=O)N(CC)C3)CC4</chem>                                              | MDR1       |
| <b>Doxepin</b>                         | <chem>O2C3=C(C(=CCN(C)C)C1=C(C=CC=C1)C2)C=CC=C3</chem>                                                          | MDR1       |
| <b>Doxylamine</b>                      | <chem>CC(c1ccccc1)(c2cccn2)OCCN(C)C</chem>                                                                      | MDR1       |
| <b>Gamfexine</b>                       | <chem>C2=C(C(C1CCCCC1)CCN(C)C)C=CC=C2</chem>                                                                    | MDR1       |
| <b>Homoclomin</b>                      | <chem>CN1CCCN(CC1)C(c2ccccc2)c3ccc(Cl)cc3</chem>                                                                | MDR1       |
| <b>Imipramine</b>                      | <chem>N(C)(C)CCCN2C1=C(C=CC=C1)CCC3=C2C=CC=C3</chem>                                                            | MDR1, OCT1 |

|                                                                    |                                                                             |                           |
|--------------------------------------------------------------------|-----------------------------------------------------------------------------|---------------------------|
| <b>Levomeprazine</b>                                               | <chem>COc1ccc2Sc3ccccc3N(C[C@H](C)CN(C)C)c2c1</chem>                        | MDR1                      |
| <b>Lidocaine</b>                                                   | <chem>O=C(NC1=C(C)C=CC=C1C)CN(CC)CC</chem>                                  | MDR1,<br>OATP2B1,<br>OCT1 |
| <b>Maprotiline</b>                                                 | <chem>N(C)CCCC13C4=C(C(C2=C1C=CC=C2)CC3)C=CC=C4</chem>                      | MDR1, BCRP,<br>MRP2       |
| <b>Mephentermine</b>                                               | <chem>CC(C)(CC1=CC=CC=C1)NC</chem>                                          | MDR1                      |
| <b>Metergoline</b>                                                 | <chem>CN1CC(CNC(=O)OCc2ccccc2)CC2C1Cc1cn(C)c3cccc2c13</chem>                | MDR1                      |
| <b>Methadone</b>                                                   | <chem>O=C(C(C1=CC=CC=C1)(C2=CC=CC=C2)CC(C)N(C)C)CC</chem>                   | MDR1                      |
| <b>Methapyrilene</b>                                               | <chem>S2C(CN(C1=NC=CC=C1)CCN(C)C)=CC=C2</chem>                              | MDR1                      |
| <b>Methixene</b>                                                   | <chem>CN1CCCC(C1)CC1c2ccccc2Sc2c1cccc2</chem>                               | MDR1                      |
| <b>Mitomycin C</b>                                                 | <chem>CO[C@]12[C@H]3N[C@H]3CN1C1=C([C@H]2COC(N)=O)C(=O)C(N)=C(C)C1=O</chem> | MDR1                      |
| <b>N-[2-(3,4-dimethoxyphenyl)ethyl]-1-methylpyrrolidin-2-imine</b> | <chem>CN1/C(CCC1)=N\CCC2=CC=C(OC)C(OC)=C2</chem>                            | MDR1                      |
| <b>Naltrexone</b>                                                  | <chem>O5C4=C3C26C(O)(C(N(CC1CC1)CC2)CC3=CC=C4O)CCC(=O)C56</chem>            | MDR1, OCT1                |
| <b>N-Desmethyl-venlafaxine</b>                                     | <chem>CNCC(C1=CC=C(OC)C=C1)C1(O)CCCCC1</chem>                               | MDR1                      |

|                                 |                                                                     |                        |
|---------------------------------|---------------------------------------------------------------------|------------------------|
| <b>N-methylquinidine</b>        | <chem>C[N+]12CCC(CC1[C@H](C3=C4C=C(C=CC4=NC=C3)OC)O)C(C2)C=C</chem> | MDR1, OCT1             |
| <b>Nortriptyline</b>            | <chem>N(C)CCC=C2C1=C(C=CC=C1)CCC3=C2C=CC=C3</chem>                  | MDR1                   |
| <b>NSC-664565</b>               | <chem>CC1=CC(C)C(C)N(CC2=NCCN2)C3=CC=CC=C31</chem>                  | MDR1                   |
| <b>o-Desmethyl-venlafaxine</b>  | <chem>CN(C)CC(c1ccc(O)cc1)C1(O)CCCCC1</chem>                        | MDR1                   |
| <b>Orphenadrine</b>             | <chem>CN(C)CCOC(c1cccc1)c1cccc1C</chem>                             | MDR1, BCRP, OCT1       |
| <b>Parhexilene</b>              | <chem>[H][C@@]1(NCCCC1)CC(C2CCCCC2)C3CCCCC3</chem>                  | MDR1                   |
| <b>Phenethyl isothiocyanate</b> | <chem>c1ccc(cc1)CCN=C=S</chem>                                      | MDR1, BCRP, MRP1, MRP2 |
| <b>Pheniramine</b>              | <chem>CN(C)CCC(C1=CC=CC=C1)C1=CC=CC=N1</chem>                       | MDR1                   |
| <b>Pinafide</b>                 | <chem>[O-][N+](=O)c1cc2C(=O)N(CCN3CCCC3)C(=O)c3cccc(c1)c23</chem>   | MDR1                   |
| <b>Pridinol</b>                 | <chem>OC(CCN1CCCCC1)(C1=CC=CC=C1)C1=CC=CC=C1</chem>                 | MDR1                   |
| <b>Proadifen</b>                | <chem>CCCC(C(=O)OCCN(CC)CC)(c1cccc1)c1cccc1</chem>                  | MDR1                   |
| <b>Procyclidine</b>             | <chem>OC(CCN1CCCCC1)(C1CCCCC1)c1cccc1</chem>                        | MDR1, BCRP, MRP2       |

|                                 |                                                                                  |                                 |
|---------------------------------|----------------------------------------------------------------------------------|---------------------------------|
| <b>Profenamine</b>              | <chem>CCN(CC)C(C)CN1C2=CC=CC=C2SC2=CC=CC=C12</chem>                              | MDR1                            |
| <b>Promazine</b>                | <chem>S1C3=C(N(CCCN(C)C)C2=C1C=CC=C2)C=CC=C3</chem>                              | MDR1, OCT1                      |
| <b>Promethazine</b>             | <chem>S1C3=C(N(CC(C)N(C)C)C2=C1C=CC=C2)C=CC=C3</chem>                            | MDR1, OCT1                      |
| <b>Propafenone_cmpd_ref1_2d</b> | <chem>CCCNCCC1=C(CCC2=CC=CC=C2)C(C=CC=C3)=C3O1</chem>                            | MDR1                            |
| <b>Propafenone_deriv_ref4_4</b> | <chem>N1(CCOC2=C(CCC3=CC=CC=C3)C(C=CC=C4)=C4O2)CC1</chem>                        | MDR1                            |
| <b>Propranolol</b>              | <chem>O(C1=C2C(=CC=C1)C=CC=C2)CC(O)CNC(C)C</chem>                                | MDR1, BCRP, MRP2, OATP2B1, OCT1 |
| <b>Protriptyline</b>            | <chem>CNCCCC1C2=CC=CC=C2C=CC2=CC=CC=C12</chem>                                   | MDR1                            |
| <b>Quinine</b>                  | <chem>[H][C@]1(C[C@@H]2CC[N@]1C[C@@H]2C=C)[C@H](O)C1=CC=NC2=CC=C(OC)C=C12</chem> | MDR1, BCRP, MRP1, ASBT, OCT1    |
| <b>Ramosetron</b>               | <chem>CN1C=C(C2=CC=CC=C2)C(=O)[C@@H]3CCC4=C(C3)NC=N4</chem>                      | MDR1                            |
| <b>Rotoxamine</b>               | <chem>[C@H](OCCN(C)C)(C1=CC=C(C1)C=C1)C2=CC=CC=N2</chem>                         | MDR1                            |
| <b>Selegiline</b>               | <chem>CC(CC1=CC=CC=C1)N(C)CC#C</chem>                                            | MDR1                            |
| <b>Sumatriptan</b>              | <chem>CNS(=O)(=O)Cc1ccc2c(c1)c(c[nH]2)CCN(C)C</chem>                             | MDR1                            |



|                        |                                                                         |                        |
|------------------------|-------------------------------------------------------------------------|------------------------|
| <b>Thenyldiamine</b>   | <chem>CN(C)CCN(CC1=CSC=C1)C1=CC=CC=N1</chem>                            | MDR1                   |
| <b>Thonzylamine</b>    | <chem>COc1ccc(CN(CC(N(C)C)c2ncccn2)cc1</chem>                           | MDR1                   |
| <b>Timolol</b>         | <chem>CC(C)(C)NC[C@H](O)COc1nsnc1N1CCOCC1</chem>                        | MDR1, BCRP, MRP2, OCT1 |
| <b>Tomoxetine</b>      | <chem>CNCCC(Oc1ccccc1C)c1ccccc1</chem>                                  | MRP2                   |
| <b>Trihexyphenidyl</b> | <chem>OC(CCN1CCCCC1)(C1CCCCC1)c1ccccc1</chem>                           | OCT1                   |
| <b>Trimipramine</b>    | <chem>N(C)(C)CC(C)CN2C1=C(C=CC=C1)CCC3=C2C=CC=C3</chem>                 | MDR1, OCT1             |
| <b>Venlafaxine</b>     | <chem>COC1=CC=C(C=C1)C(CN(C)C)C1(O)CCCCC1</chem>                        | MDR1, OATP2B1          |
| <b>Vincamine</b>       | <chem>O=C(OC)[C@]3(O)n1c4c(c2ccccc12)CCN5CCC[C@](C3)(C)C[C@@H]45</chem> | MDR1                   |
| <b>Xylometazoline</b>  | <chem>CC1=CC(=CC(C)=C1CC1=NCCN1)C(C)(C)C</chem>                         | MDR1                   |
| <b>Zolamine</b>        | <chem>COc1ccc(CN(CC(N(C)C)c2nccs2)cc1</chem>                            | MDR1                   |

**Table S5.** Virtual screening selected compounds from the Recon 2 database.

| Compound                                         | SMILES                                                                      | CHARGE         |
|--------------------------------------------------|-----------------------------------------------------------------------------|----------------|
| <b>Thyrotropin releasing hormone</b>             | <chem>OC(=N)[C@@H]1CCCN1C(=O)[C@H](CC1=CN=CN1)N=C(O)[C@@H]1CCC(O)=N1</chem> | positive       |
| <b>N-Methylserotonin<sup>(1)</sup></b>           | <chem>CNCCC1=CNC2=C1C=C(O)C=C2</chem>                                       | positive       |
| <i>Melatonin<sup>(2)</sup></i>                   | <chem>CC(=O)NCCc1c[nH]c2c1cc(cc2)OC</chem>                                  | <i>neutral</i> |
| <b>5,6,7,8-Tetrahydrobiopterin<sup>(2)</sup></b> | <chem>CC(O)C(O)C1CNc2nc(N)[nH]c(=O)c2N1</chem>                              | <i>neutral</i> |

<sup>(1)</sup>Compound, although positively charged at pH 7.4, showed a low Glob-Prod similarity score, and thus was not classified as a possible G-I and selected to validate the pharmacophore

<sup>(2)</sup>Compounds in italics were filtered out by the charge-filter applied, but they were selected to validate the pharmacophore.

**Table S6.**

Virtual screening selected hits from the HMDB database.

| Compound                                     | SMILES                                                  |
|----------------------------------------------|---------------------------------------------------------|
| (2S,2'S)-Pyrosaccharopine                    | <chem>NC(CCCCN1C(CCC1=O)C(O)=O)C(O)=O</chem>            |
| 1,4'-Bipiperidine-1'-carboxylic acid         | <chem>OC(=O)N1CCC(CC1)N1CCCCC1</chem>                   |
| 1-Isothiocyanato-4-phenylbutane              | <chem>S=C=NCCCCC1=CC=CC=C1</chem>                       |
| 2-Hydroxyclo mipramine                       | <chem>CN(C)CCCN1C2=CC=CC=C2CCC2=CC(O)=C(Cl)C=C12</chem> |
| 2-hydroxydesipramine                         | <chem>CNCCCN1C2=CC=CC=C2CCC2=CC(O)=CC=C12</chem>        |
| 2-hydroxyimipramine                          | <chem>CN(C)CCCN1C2=CC=CC=C2CCC2=CC(O)=CC=C12</chem>     |
| 3-(Isothiocyanatomethyl)-1-methoxy-1H-indole | <chem>CON1C=C(CN=C=S)C2=CC=CC=C12</chem>                |
| 3-Hydroxy monoethylglycinexylidide           | <chem>CCNCC(=O)NC1=C(C)C=CC(O)=C1C</chem>               |
| 3-Phenylpropionylglycine                     | <chem>OC(=O)CNCCC(=O)C1=CC=CC=C1</chem>                 |
| 4-Hydroxyatomoxetine                         | <chem>CNCC[C@@H](OC1=CC=C(O)C=C1C)C1=CC=CC=C1</chem>    |

|                                       |                                                                  |
|---------------------------------------|------------------------------------------------------------------|
| <b>5-Hydroxymethyl tolterodine</b>    | <chem>CC(C)N(CC[C@H](C1=CC=CC=C1)C1=C(O)C=CC(CO)=C1)C(C)C</chem> |
| <b>8-Hydroxydesmethylclomipramine</b> | <chem>CNCCCN1C2=CC=C(O)C=C2CCC2=CC=C(Cl)C=C12</chem>             |
| <b>Acepromazine</b>                   | <chem>CN(C)CCCN1C2=CC=CC=C2SC2=C1C=C(C=C2)C(C)=O</chem>          |
| <b>Aceprometazine</b>                 | <chem>CC(CN1C2=CC=CC=C2SC2=C1C=C(C=C2)C(C)=O)N(C)C</chem>        |
| <b>Amitriptyline</b>                  | <chem>CN(C)CCC=C1C2=CC=CC=C2CCC2=CC=CC=C12</chem>                |
| <b>Antazoline</b>                     | <chem>C(N(CC1=CC=CC=C1)C1=CC=CC=C1)C1=NCCN1</chem>               |
| <b>Apraclonidine</b>                  | <chem>NC1=CC(Cl)=C(NC2=NCCN2)C(Cl)=C1</chem>                     |
| <b>Aprindine</b>                      | <chem>CCN(CC)CCCN(C1CC2=CC=CC=C2C1)C1=CC=CC=C1</chem>            |
| <b>Asparaginyl-Tyrosine</b>           | <chem>NC(CC(N)=O)C(=O)NC(CC1=CC=C(O)C=C1)C(O)=O</chem>           |
| <b>Atherosperminine</b>               | <chem>COC1=C(OC)C2=C(C=CC3=CC=CC=C23)C(CCN(C)C)=C1</chem>        |
| <b>Atomoxetine</b>                    | <chem>CNCC[C@@H](OC1=CC=CC=C1C)C1=CC=CC=C1</chem>                |
| <b>Biperiden</b>                      | <chem>OC(CCN1CCCCC1)(C1CC2CC1C=C2)C1=CC=CC=C1</chem>             |

|                             |                                                                  |
|-----------------------------|------------------------------------------------------------------|
| <b>Bromodiphenhydramine</b> | <chem>CN(C)CCOC(C1=CC=CC=C1)C1=CC=C(Br)C=C1</chem>               |
| <b>Brompheniramine</b>      | <chem>CN(C)CCC(C1=CC=C(Br)C=C1)C1=CC=CC=N1</chem>                |
| <b>Calycanthidine</b>       | <chem>CN1CCC2(C1NC1=C2C=CC=C1)C12CCN(C)C1N(C)C1=C2C=CC=C1</chem> |
| <b>Carbinoxamine</b>        | <chem>CN(C)CCOC(C1=CC=C(Cl)C=C1)C1=CC=CC=N1</chem>               |
| <b>Carteolol</b>            | <chem>CC(C)(C)NCC(O)COC1=CC=CC2=C1CCC(=O)N2</chem>               |
| <b>Chlophedianol</b>        | <chem>CN(C)CCC(O)(C1=CC=CC=C1)C1=CC=CC=C1Cl</chem>               |
| <b>Chlorpheniramine</b>     | <chem>CN(C)CCC(C1=CC=C(Cl)C=C1)C1=CC=CC=N1</chem>                |
| <b>Chlorpromazine</b>       | <chem>CN(C)CCCN1C2=CC=CC=C2SC2=C1C=C(Cl)C=C2</chem>              |
| <b>Citalopram</b>           | <chem>CN(C)CCCC1(OCC2=C1C=CC(=C2)C#N)C1=CC=C(F)C=C1</chem>       |
| <b>Clomipramine</b>         | <chem>CN(C)CCCN1C2=CC=CC=C2CCC2=C1C=C(Cl)C=C2</chem>             |
| <b>Cocaethylene</b>         | <chem>CCOC(=O)C1C2CCC(CC1OC(=O)C1=CC=CC=C1)N2C</chem>            |
| <b>Cuscohygrine</b>         | <chem>CN1CCCC1CC(=O)CC1CCCN1C</chem>                             |

|                              |                                                                                       |
|------------------------------|---------------------------------------------------------------------------------------|
| <b>Cyclobenzaprine</b>       | <chem>CN(C)CCC=C1C2=CC=CC=C2C=CC2=CC=CC=C12</chem>                                    |
| <b>Cycrimine</b>             | <chem>OC(CCN1CCCCC1)(C1CCCC1)C1=CC=CC=C1</chem>                                       |
| <b>Cysteinyl-Isoleucine</b>  | <chem>CCC(C)C(NC(=O)C(N)CS)C(O)=O</chem>                                              |
| <b>desmethylclomipramine</b> | <chem>CNCCC1C2=CC=CC=C2CCC2=C1C=C(Cl)C=C2</chem>                                      |
| <b>Dicyclomine</b>           | <chem>CCN(CC)CCOC(=O)C1(CCCCC1)C1CCCCC1</chem>                                        |
| <b>Diethylpropion</b>        | <chem>CCN(CC)C(C)C(=O)C1=CC=CC=C1</chem>                                              |
| <b>Dimenhydrinate</b>        | <chem>CN1C2=C([N-]C(Cl)=N2)C(=O)N(C)C1=O.C[NH+](C)CCOC(C1=CC=CC=C1)C1=CC=CC=C1</chem> |
| <b>Dimethindene</b>          | <chem>CC(C1=C(CCN(C)C)CC2=CC=CC=C12)C1=CC=CC=N1</chem>                                |
| <b>Dimethylamphetamine</b>   | <chem>CC(CC1=CC=CC=C1)N(C)C</chem>                                                    |
| <b>Dimethyltryptamine</b>    | <chem>CN(C)CCC1=CNC2=CC=CC=C12</chem>                                                 |
| <b>Doxapram</b>              | <chem>CCN1CC(CCN2CCOCC2)C(C1=O)(C1=CC=CC=C1)C1=CC=CC=C1</chem>                        |
| <b>Doxepin</b>               | <chem>[H]C(CCN(C)C)=C1C2=CC=CC=C2COC2=CC=CC=C12</chem>                                |

|                                      |                                                          |
|--------------------------------------|----------------------------------------------------------|
| <b>Doxylamine</b>                    | <chem>CN(C)CCOC(C)(C1=CC=CC=C1)C1=NC=CC=C1</chem>        |
| <b>Duloxetine</b>                    | <chem>CNCC[C@H](OC1=CC=CC2=CC=CC=C12)C1=CC=CS1</chem>    |
| <b>Dumetorine</b>                    | <chem>CN1CCCCC1CC1CC(C)=CC(=O)O1</chem>                  |
| <b>E-10-Hydroxyamitriptyline</b>     | <chem>CN(C)CC\C=C/C1/C2=CC=CC=C2CC(O)C2=CC=CC=C12</chem> |
| <b>Emedastine</b>                    | <chem>CCOCCN1C(=NC2=CC=CC=C12)N1CCCN(C)CC1</chem>        |
| <b>Ethopropazine</b>                 | <chem>CCN(CC)C(C)CN1C2=CC=CC=C2SC2=CC=CC=C12</chem>      |
| <b>Fencamfamine</b>                  | <chem>CCNC1C2CCC(C2)C1C1=CC=CC=C1</chem>                 |
| <b>Fenoldopam</b>                    | <chem>OC1=CC=C(C=C1)C1CNCCC2=C(Cl)C(O)=C(O)C=C12</chem>  |
| <b>Fluoxetine</b>                    | <chem>CNCCC(OC1=CC=C(C=C1)C(F)(F)F)C1=CC=CC=C1</chem>    |
| <b>gamma-Glutamylcysteinylserine</b> | <chem>NC(CCC(=O)NC(CS)C(=O)NC(CO)C(O)=O)C(O)=O</chem>    |
| <b>Glutaminyl-Phenylalanine</b>      | <chem>NC(CCC(N)C(NC(C(O)=O)CC1=CC=CC=C1)=O)=O</chem>     |
| <b>Hydroxyclo mipramine</b>          | <chem>CN(C)CCCN1C2=CC=CC=C2CC(O)C2=C1C=C(Cl)C=C2</chem>  |

|                             |                                                                        |
|-----------------------------|------------------------------------------------------------------------|
| <b>Ibopamine</b>            | <chem>CNCCC1=CC(OC(=O)C(C)C)=C(OC(=O)C(C)C)C=C1</chem>                 |
| <b>Imipramine</b>           | <chem>CN(C)CCCN1C2=CC=CC=C2CCC2=CC=CC=C12</chem>                       |
| <b>Imiquimod</b>            | <chem>CC(C)CN1C=NC2=C1C1=CC=CC=C1N=C2N</chem>                          |
| <b>Indecainide</b>          | <chem>CC(C)NCCCC1(C(N)=O)C2=CC=CC=C2C2=CC=CC=C12</chem>                |
| <b>Isomugineic acid</b>     | <chem>OC(CN1CCC1C(O)=O)C(NCCC(O)C(O)=O)C(O)=O</chem>                   |
| <b>Isothipendyl</b>         | <chem>CC(CN1C2=CC=CC=C2SC2=C1N=CC=C2)N(C)C</chem>                      |
| <b>Lepidine B</b>           | <chem>OC1=CC=CC(CC2=NC=CN2)=C1OC1=CC=CC(CC2=NC=CN2)=C1</chem>          |
| <b>Lepidine C</b>           | <chem>COC1=CC=C(OC2=CC=CC(CC3=NC=CN3)=C2)C(CC2=NC=CN2)=C1</chem>       |
| <b>Lepidine D</b>           | <chem>OC1=CC=C(OC2=CC=CC(CC3=NC=CN3)=C2)C(CC2=NC=CN2)=C1</chem>        |
| <b>Lepidine F</b>           | <chem>OC1=CC=C(C(CC2=NC=CN2)=C1)C1=C(O)C=CC(CC2=NC=CN2)=C1</chem>      |
| <b>Levomethadyl Acetate</b> | <chem>CC[C@H](OC(C)=O)C(C[C@H](C)N(C)C)(C1=CC=CC=C1)C1=CC=CC=C1</chem> |
| <b>Lofexidine</b>           | <chem>CC(OC1=C(Cl)C=CC=C1Cl)C1=NCCN1</chem>                            |



|                                                    |                                                                                   |
|----------------------------------------------------|-----------------------------------------------------------------------------------|
| <b>L-phenylalanyl-L-hydroxyproline</b>             | <chem>NC(CC1=CC=CC=C1)C(=O)N1CC(O)CC1C(O)=O</chem>                                |
| <b>Maprotiline</b>                                 | <chem>CNCCCC12CCC(C3=CC=CC=C13)C1=CC=CC=C21</chem>                                |
| <b>Mepyramine</b>                                  | <chem>COC1=CC=C(CN(CCN(C)C)C2=NC=CC=C2)C=C1</chem>                                |
| <b>Mesoridazine</b>                                | <chem>CN1CCCCC1CCN1C2=CC=CC=C2SC2=C1C=C(C=C2)S(C)=O</chem>                        |
| <b>Methadone</b>                                   | <chem>CCC(=O)C(CC(C)N(C)C)(C1=CC=CC=C1)C1=CC=CC=C1</chem>                         |
| <b>Methadyl Acetate</b>                            | <chem>CCC(OC(C)=O)C(CC(C)N(C)C)(C1=CC=CC=C1)C1=CC=CC=C1</chem>                    |
| <b>Methylphenidate</b>                             | <chem>COC(=O)C(C1CCCCN1)C1=CC=CC=C1</chem>                                        |
| <b>Mitomycin</b>                                   | <chem>CO[C@]12[C@H]3N[C@H]3CN1C1=C([C@H]2COC(N)=O)C(=O)C(N)=C(C)C1=O</chem>       |
| <b>mono-isopropyl-disopyramide</b>                 | <chem>CC(C)NCCC(C(O)=N)(C1=CC=CC=C1)C1=CC=CC=N1</chem>                            |
| <b>N-(1-Deoxy-1-fructosyl)tryptophan</b>           | <chem>OC[C@H]1OC(O)(CN[C@@H](CCC2=CN(C3=C2C=CC=C3)C(O)=O)[C@@H](O)[C@@H]1O</chem> |
| <b>N-(1-Deoxy-1-fructosyl)tyrosine</b>             | <chem>OC[C@H]1OC(O)(CN[C@@H](CC2=CC=C(O)C=C2)C(O)=O)[C@@H](O)[C@@H]1O</chem>      |
| <b>N-(Carbomethoxyacetyl)-4-S-chlorotryptophan</b> | <chem>COC(=O)C\C(O)=N\C(CC1=CN(C2=CC=CC(Cl)=C12)C(O)=O</chem>                     |

|                                   |                                                          |
|-----------------------------------|----------------------------------------------------------|
| <b>N,O-Didesmethylvenlafaxine</b> | <chem>CNCC(C1=CC=C(O)C=C1)C1(O)CCCCC1</chem>             |
| <b>N-Acetylhistidine</b>          | <chem>CC(=O)NC(CC1=CNC=N1)C(O)=O</chem>                  |
| <b>N-Dealkylated tolterodine</b>  | <chem>CC(C)NCC[C@H](C1=CC=CC=C1)C1=C(O)C=CC(C)=C1</chem> |
| <b>N-Demethyl orphenadrine</b>    | <chem>CNCCOC(C1=CC=CC=C1)C1=CC=CC=C1C</chem>             |
| <b>N-Desmethyl tapentadol</b>     | <chem>CC[C@H]([C@@H](C)CNC)C1=CC(O)=CC=C1</chem>         |
| <b>N-desmethyalmotriptan</b>      | <chem>CNCCC1=CNC2=C1C=C(CS(=O)(=O)N1CCCC1)C=C2</chem>    |
| <b>N-Desmethylcitalopram</b>      | <chem>CNCCCC1(OCC2=C1C=CC(=C2)C#N)C1=CC=C(F)C=C1</chem>  |
| <b>N-Desmethylpromazine</b>       | <chem>CNCCCN1C2=CC=CC=C2SC2=CC=CC=C12</chem>             |
| <b>N-Desmethylvenlafaxine</b>     | <chem>CNCC(C1=CC=C(OC)C=C1)C1(O)CCCCC1</chem>            |
| <b>Norpropoxyphene</b>            | <chem>CCC(=O)OC(CC1=CC=CC=C1)(C(C)CNC)C1=CC=CC=C1</chem> |
| <b>Orphenadrine</b>               | <chem>CN(C)CCOC(C1=CC=CC=C1)C1=CC=CC=C1C</chem>          |
| <b>Oxymetazoline</b>              | <chem>CC1=CC(=C(O)C(C)=C1CC1=NCCN1)C(C)(C)C</chem>       |

|                              |                                                                          |
|------------------------------|--------------------------------------------------------------------------|
| <b>Oxynarcotine</b>          | <chem>CNCCC1=CC2=C(OCO2)C(OC)=C1CC(=O)C1=C(C(O)=O)C(OC)=C(OC)C=C1</chem> |
| <b>Perhexiline</b>           | <chem>C(C(C1CCCCC1)C1CCCCC1)C1CCCCN1</chem>                              |
| <b>Phendimetrazine</b>       | <chem>CC1C(OCCN1C)C1=CC=CC=C1</chem>                                     |
| <b>Pheniramine</b>           | <chem>CN(C)CCC(C1=CC=CC=C1)C1=CC=CC=N1</chem>                            |
| <b>Phentolamine</b>          | <chem>CC1=CC=C(C=C1)N(CC1=NCCN1)C1=CC(O)=CC=C1</chem>                    |
| <b>Phygrine</b>              | <chem>CN1CCCC1CC(=O)CC1CCC(CC(C)=O)N1C</chem>                            |
| <b>Procyclidine</b>          | <chem>OC(CCN1CCCC1)(C1CCCCC1)C1=CC=CC=C1</chem>                          |
| <b>Prolintane</b>            | <chem>CCCC(CC1=CC=CC=C1)N1CCCC1</chem>                                   |
| <b>Prolyl-Valine</b>         | <chem>CC(C)C(NC(=O)C1CCCN1)C(O)=O</chem>                                 |
| <b>Promazine</b>             | <chem>CN(C)CCCN1C2=CC=CC=C2SC2=CC=CC=C12</chem>                          |
| <b>Promazine 5-sulfoxide</b> | <chem>CN(C)CCCN1C2=CC=CC=C2S(=O)C2=CC=CC=C12</chem>                      |
| <b>Promethazine</b>          | <chem>CC(CN1C2=CC=CC=C2SC2=CC=CC=C12)N(C)C</chem>                        |

|                        |                                                                                      |
|------------------------|--------------------------------------------------------------------------------------|
| <b>Propiomazine</b>    | <chem>CCC(=O)C1=CC2=C(SC3=CC=CC=C3N2CC(C)N(C)C)C=C1</chem>                           |
| <b>Propoxyphene</b>    | <chem>CCC(=O)OC(CC1=CC=CC=C1)([C@H](C)CN(C)C)C1=CC=CC=C1</chem>                      |
| <b>Propylhexedrine</b> | <chem>CNC(C)CC1CCCCC1</chem>                                                         |
| <b>Protriptyline</b>   | <chem>CNCCCC1C2=CC=CC=C2C=CC2=CC=CC=C12</chem>                                       |
| <b>Quinidine</b>       | <chem>[H][C@@]12CCN(C[C@@H]1C=C)[C@]([H])(C2)[C@@H](O)C1=C2C=C(OC)C=CC2=NC=C1</chem> |
| <b>Rizatriptan</b>     | <chem>CN(C)CCC1=CNC2=C1C=C(CN1C=NC=N1)C=C2</chem>                                    |
| <b>Ropivacaine</b>     | <chem>CCCN1CCCC[C@H]1C(=O)NC1=C(C)C=CC=C1C</chem>                                    |
| <b>Sibutramine</b>     | <chem>CC(C)CC(N(C)C)C1(CCC1)C1=CC=C(Cl)C=C1</chem>                                   |
| <b>Sumatriptan</b>     | <chem>CNS(=O)(=O)CC1=CC2=C(NC=C2CCN(C)C)C=C1</chem>                                  |
| <b>Tertatolol</b>      | <chem>CC(C)(C)NCC(O)COC1=CC=CC2=C1SCCC2</chem>                                       |
| <b>Thalicpureine</b>   | <chem>CNCCC1=C(OC)C(OC)=C(OC)C2=C1C=CC1=C2C=C(OC)C(OC)=C1</chem>                     |

**Table S7.**

Predicted P-gp inhibition effect for the proton-antiporter good-inhibitors according to the VolSurf+ PLS-DA model.

| Name             | Predicted P-gp inhibition(LV2) | Literature P-gp inhibition <sup>(1)</sup> |
|------------------|--------------------------------|-------------------------------------------|
| Verapamil        | I                              | I                                         |
| Compound 3*      | I                              |                                           |
| Buprenorphine    | I                              |                                           |
| Chlorpromazine   | I                              | I                                         |
| Clomipramine     | I                              | I                                         |
| Amitriptyline    | N-I                            |                                           |
| Quinine          | N-I                            | I                                         |
| Compound 6*      | N-I                            |                                           |
| Imipramine       | N-I                            | N-I                                       |
| Methadone        | N-I                            |                                           |
| Compound 1*      | N-I                            |                                           |
| Doxepin          | N-I                            |                                           |
| Pheniramine      | N-I                            | N-I                                       |
| Cocaethylene     | N-I                            |                                           |
| Compound 2*      | N-I                            |                                           |
| Diphenhydramine  | N-I                            | N-I                                       |
| Nortriptyline    | N-I                            | N-I                                       |
| Norbuprenorphine | N-I                            |                                           |
| Compound 4*      | N-I                            |                                           |
| Compound 9*      | N-I                            |                                           |
| Desipramine      | N-I                            | N-I                                       |
| Compound 5*      | N-I                            |                                           |
| Desomorphine     | N-I                            |                                           |
| MDMA             | N-I                            |                                           |
| Tryptamine       | N-I                            |                                           |

<sup>(1)</sup>(Broccatelli *et al.*, 2011) and references cited therein. \* Specs compounds see Table 3

## B. Supplementary Figure

### **Figure S1.**

*Passive and carrier-mediated flux of naloxone in hCMEC/D3 cells.* Total uptake (nmol/min/mg; black dashed line) was measured in hCMEC/D3 cells and plotted against total naloxone concentration in the Krebs-HEPES (KH) incubation buffer at  $\text{pH}_e$  7.40. The blue straight dotted line represents the passive transport of clonidine ( $K_{\text{passive}} 3.4 \pm 0.3 \mu\text{L}\cdot\text{min}^{-1}\cdot\text{mg}^{-1}$  at pH 7.40). The red solid line represents the curve obtained by subtracting the passive flux from the total flux and fitting to the carrier-mediated Michaelis-Menten term (see Eq. 1) by nonlinear least-square regression. Estimated parameters for naloxone transport in hCMEC/D3 cells are:  $K_m$ ,  $0.19 \pm 0.05 \text{ mmol}\cdot\text{L}^{-1}$ ,  $V_{\text{max}}$ ,  $2.9 \pm 0.5 \text{ nmol min}^{-1}\cdot\text{mg}^{-1}$ . Data represent means  $\pm$  SD of experiments performed in triplicate.

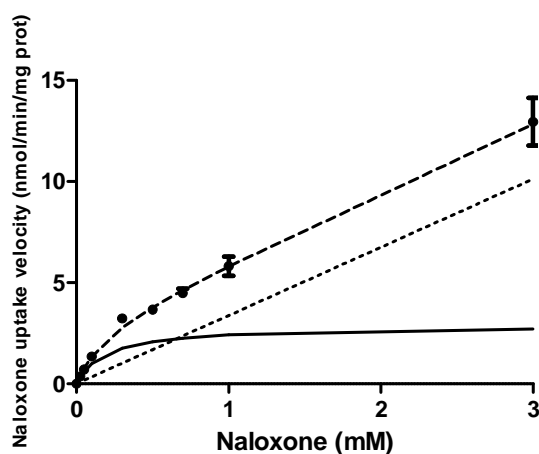

**Figure S2.**

*Second ranked pharmacophore model generated from a different alignment of imipramine, methadone and buprenorphine.* **A.** Chemical structures of the selected compounds. **B.** Alignment obtained for imipramine (purple), methadone (cyan), and buprenorphine (green). **C.** Pharmacophore obtained upon alignment in terms of common atom-centered pharmacophoric pseudo fields (pseudoPIFs): the green areas represent the hydrophobic moieties, the blue area represents the H-bond donor region, the red areas represent the H-bond acceptor regions, and the light-blue wireframe surface defines the shape of the Pharmacophore. The green and blue points represent the most relevant common pharmacophoric points at the centroid of the pseudoPIFs.

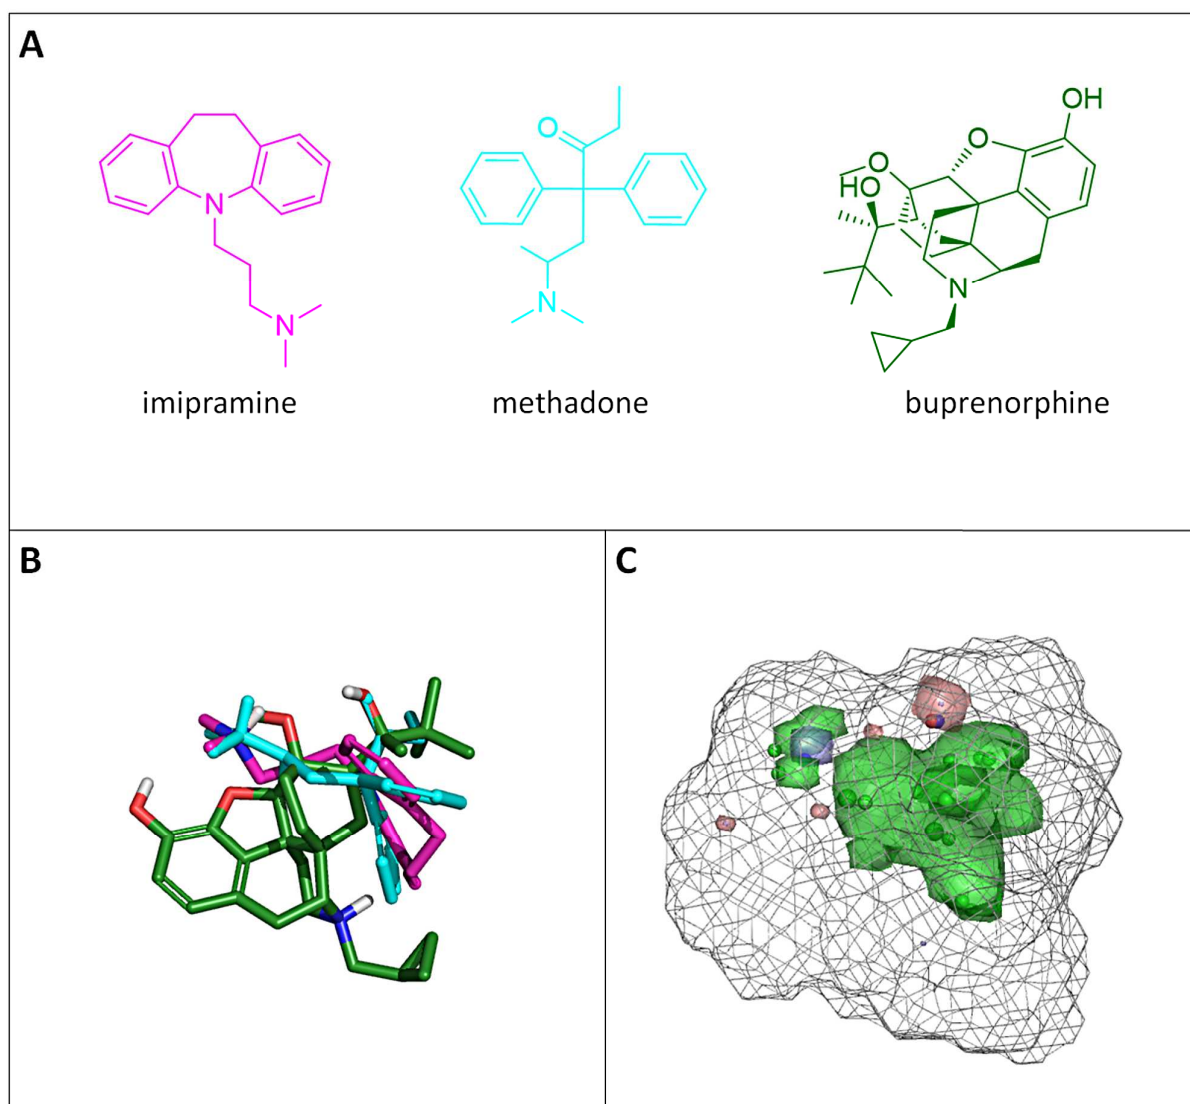

**Figure S3.**

*Selection of other three drugs based on the PCA t1-t2 score plot for the inhibitors and non-inhibitors of the proton antiporter, generated using the VolSurf+ descriptors (G-I, red circles; M-I, blue circles; W-I, black circles; N-I, green circles). The background color refers to the LogP descriptor space (blue=high LogP and red = low LogP value). It suggests that strong inhibitors have preferentially high logP and %FU10 values (LogP mean value for G-I= 3.6, for N-I= -1.0; %FU10 mean value for G-I= 78, for N-I= 22). AMI=amitriptyline, DIP=diphenhydramine, QUI=quinine.*

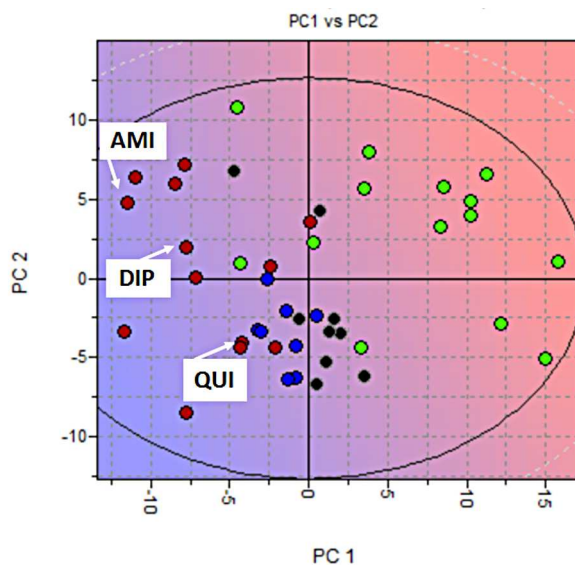



**Figure S4.**

*Pharmacophore for proton-antiporter inhibitor generated using FLAP compounds selected in Figure S3. A. Chemical structures of the selected compounds. B. Alignment obtained for amitriptyline (orange), diphenhydramine (pink), and quinine (grey). C. Pharmacophore obtained upon alignment in terms of common atom-centered pharmacophoric pseudo fields (pseudoPIFs): the green areas represent the hydrophobic moieties, the blue area represents the H-bond donor region, the red areas represent the H-bond acceptor regions, and the light-blue wireframe surface defines the shape of the Pharmacophore. The green and blue points represent the most relevant common pharmacophoric points at the centroid of the pseudoPIFs.*

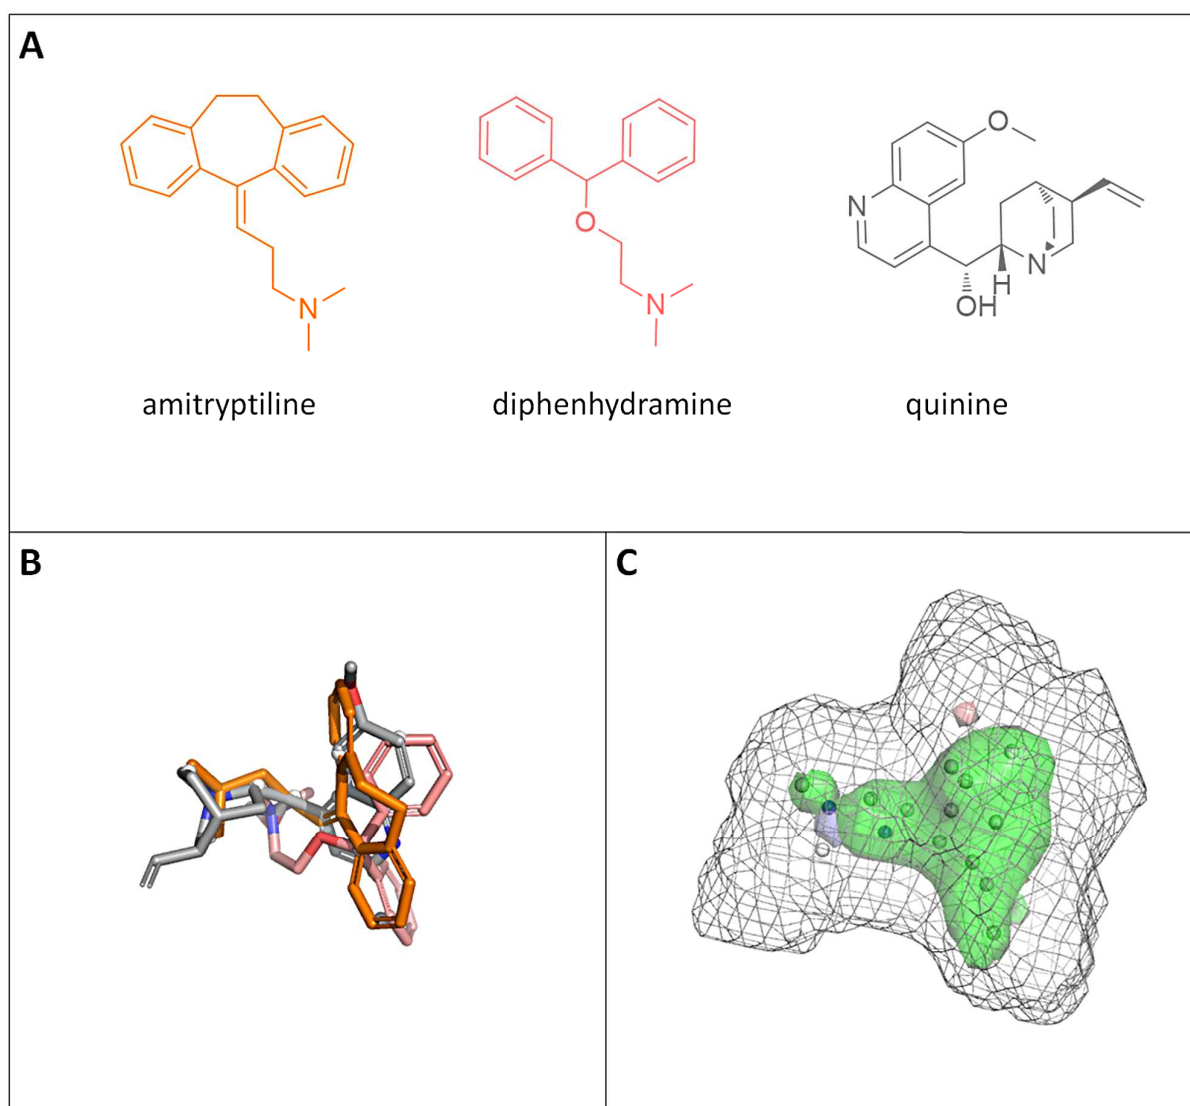

### Figure S5.

Alignment of *dymethyl-tryptamine* (orange) and *tryptamine* (cyano) on the pharmacophore. The green spheres and the blue sphere represent the main features of the pharmacophore translated in atomic coordinates (green= hydrophobic; blue= H-bond donor).

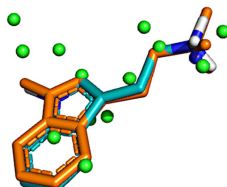

### References

Broccatelli F, Carosati E, Neri A, Frosini M, Goracci L, Oprea TI, *et al.* (2011). A novel approach for predicting P-glycoprotein (ABCB1) inhibition using molecular interaction fields. *J. Med. Chem.* **54**(6): 1740-1751.

Cruciani C, Crivori P, Carrupt PA, Testa B (2000). Molecular fields in quantitative structure-permeation relationships: the VolSurf approach. *J Mol Struc-Theochem* **503**(1-2): 17-30.

Sedykh A, Fourches D, Duan J, Hucke O, Garneau M, Zhu H, *et al.* (2013). Human intestinal transporter database: QSAR modeling and virtual profiling of drug uptake, efflux and interactions. *Pharm Res* **30**(4): 996-1007.
